# Supplementary material for: Public Attitudes for Quality and Funding of Long‐Term Care: Findings from an Australian Survey
Source: Hindawi journal article supplement (doi:10.1155/2024/5798242), 2024-01-01
Supplement: f1 [file 5798242.f1.docx]

**Supplementary Table A.1: Final attitudinal statements included in survey**

| Attitudinal statements on quality of care   1. Older people should be treated with respect and dignity 2. Aged Care Staff should have the skills and training needed to provide appropriate care and support 3. Older people and their families should be supported to raise any concerns they have with the aged care service they are receiving from organisations providing their care 4. Older people should be supported to make informed choices about the care and services that they receive 5. Older people should be supported to live the life they choose 6. The care and services provided to older people should meet their needs, goals, and preferences. 7. Older people should be supported to maintain their social relationships and connections with the community 8. The identity, culture and personal history of the older person should be known and valued by staff 9. Older people should feel safe and comfortable receiving aged care services whether in a nursing home or in their own home 10. Older people should have a trusting and supportive relationship with the staff providing their care   Attitudinal Statements on aged care funding   1. The Government should provide more funding for aged care 2. Australians should contribute towards the funding for the aged care services that they receive in line with their ability to pay 3. I would be willing to pay more tax to ensure Australians are able to access aged care services when they need them 4. I would be willing to pay more tax to improve the quality of the aged care services being provided to older Australians |
| --- |
|
|
|
|
|
|

**Supplementary Table A. 2: Socio-demographic characteristics of sample who indicated they were paying and not paying tax**

| **Variable** | **Labels** | **Taxpayers n (%)** | **Non-taxpayers n (%)** | **Test of Difference a** |
| --- | --- | --- | --- | --- |
| Sample size |  | 6563 | 3752 |  |
| Age |  |  |  | U = 17,484,864 (p<0.001) b |
| Mean (SD) |  | 42.81 (14.9) | 56.1 (18.8) |
| Median (IQR) |  | 41.0 (30-54) | 62.0 (41-72) |
| Range |  | 18-90 | 18-90 |
| Age category (years) | 18-39 | 3083 (47%) | 865 (23.1%) | X2=1807.394 (p<0.001) |
| 40-64 | 2895 (44.1%) | 1225 (32.6%) |
| ≥65 | 585 (8.9%) | 1662 (44.3%) |
| Gender | Female | 3257 (49.6%) | 1701 (45.3%) | X2=17.608 (p<0.001) |
| Male | 3306 (50.4%) | 2051 (54.7%) |
| Country of birth | Australia | 4738 (72.2%) | 2686 (71.6%) | X2=0.432  (p=0.511) |
| Others | 1825 (27.8%) | 1066 (28.4%) |
| Region | Metro | 4440 (67.7%) | 1978 (52.7%) | X2=226.477 (p<0.001) |
| Regional areas | 2123 (32.3%) | 1774 (47.3%) |
| Highest education level | Primary and some secondary school | 372 (5.7%) | 659 (17.6%) | X2=887.897 (p<0.001) |
| Completed high school | 895 (13.6%) | 842 (22.4%) |
| Some additional training  (e.g. TAFE, apprenticeship) | 1836 (28.0%) | 1284 (34.2%) |
| Undergraduate University | 2233 (34.0%) | 669 (17.8%) |
| Postgraduate University | 1227 (18.7%) | 298 (7.9%) |
| Employment status | Full-time/ part-time employment | 5410 (82.4%) | 362 (9.7%) | X2=5292.659 (p<0.001) |
| University student | 205 (3.1%) | 254 (6.8%) |
| Retired | 515 (7.8%) | 1887 (50.3%) |
| Unemployed | 254 (3.9%) | 772 (20.6%) |
| Others | 179 (2.7%) | 477 (12.7%) |
| Annual household income | <$30,000 | 544 (9.1%) | 1226 (36.8%) | X2=1973.994 (p<0.001) |
| $30,000-59,999 | 1245 (20.9%) | 1242 (37.3%) |
| $60,000-99,999 | 1701 (28.5%) | 583 (17.5%) |
| >$100,000 | 2471 (41.5%) | 277 (8.3%) |
| Close family member receiving aged care | Yes | 1570 (23.9%) | 653 (17.4%) | X2=59.987 (p<0.001) |
| No | 4993 (76.1%) | 3099 (82.6%) |

a Chi-square test unless otherwise mentioned

b Mann-Whitney U test
